# Supplementary material for: Impact of Atrial Fibrillation on In-Hospital Outcomes among Hospitalizations for Cardiac Surgery: An Analysis of the National Inpatient Sample
Source: HighWire-hosted journal article supplement (doi:10.1136/jim-2021-001864), 2022-01-05

**Supplementary table 1 -International Classification of Diseases, Ninth Revision, Clinical Modification (ICD-9-CM) codes for cardiac surgery**

|                         |                                                                                                                                                                                                                                                                                                                                                                                                                   |
|-------------------------|-------------------------------------------------------------------------------------------------------------------------------------------------------------------------------------------------------------------------------------------------------------------------------------------------------------------------------------------------------------------------------------------------------------------|
| <b>(ICD-9-CM) codes</b> | 35.10, 35.11, 35.12, 35.13, 35.14, 35.20,<br>35.21, 35.22, 35.23, 35.24, 35.25, 35.26,<br>35.27, 35.28, 35.32, 35.33,35.34,<br>35.35,35.42, 35.50, 35.51, 35.52, 35.53,<br>35.54, 35.60, 35.61, 35.62, 35.63, 35.70,<br>35.71, 35.72, 35.73, 35.81, 35.82, 35.83,<br>35.84, 35.91, 35.92, 35.93, 35.94, 35.95,<br>35.96, 35.97, 35.98, 35.99, 36.31, 36.32,<br>37.32, 37.33, 37.35, 37.51, 37.52, 37.53,<br>37.54 |
|-------------------------|-------------------------------------------------------------------------------------------------------------------------------------------------------------------------------------------------------------------------------------------------------------------------------------------------------------------------------------------------------------------------------------------------------------------|

**Supplementary figure 1: Prevalence of stroke after cardiac surgery**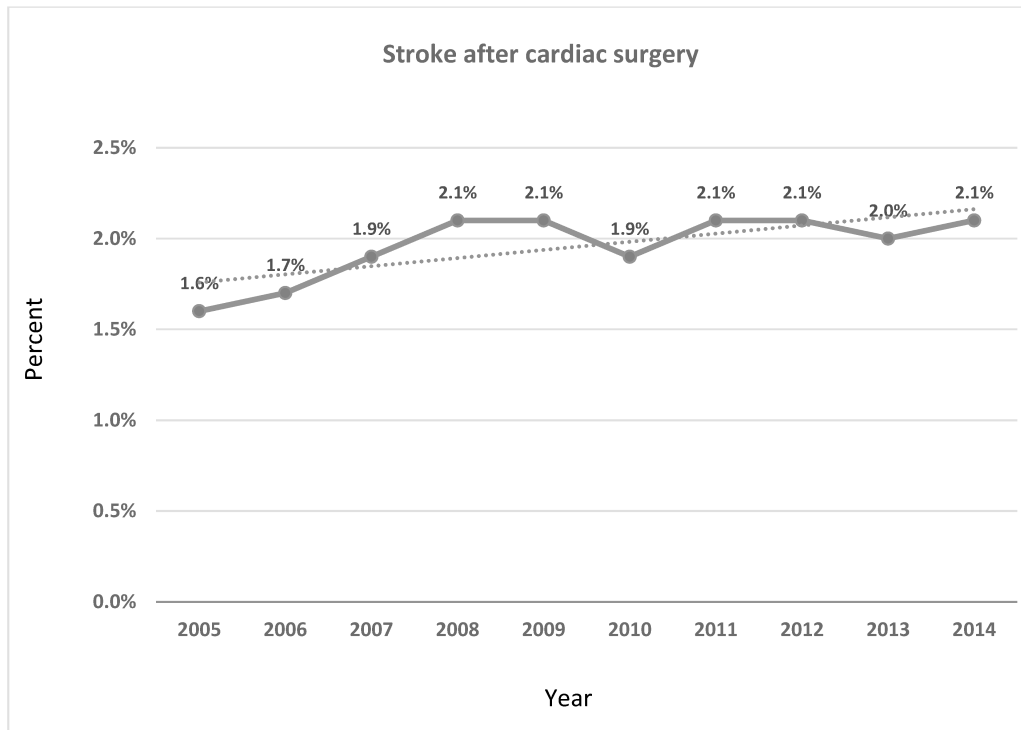

**Supplementary figure 2: Prevalence of AF in cardiac surgery patients**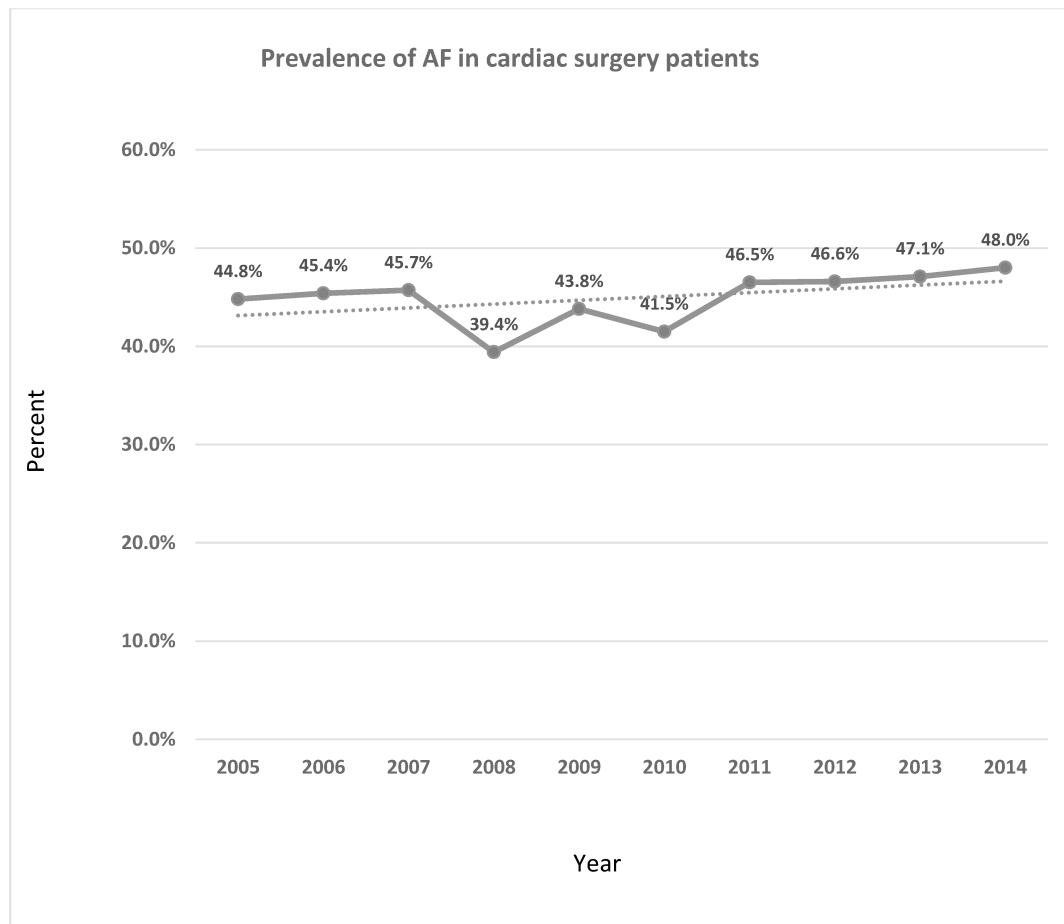

**Supplementary figure 3: Inpatient mortality in patients with AF after cardiac surgery**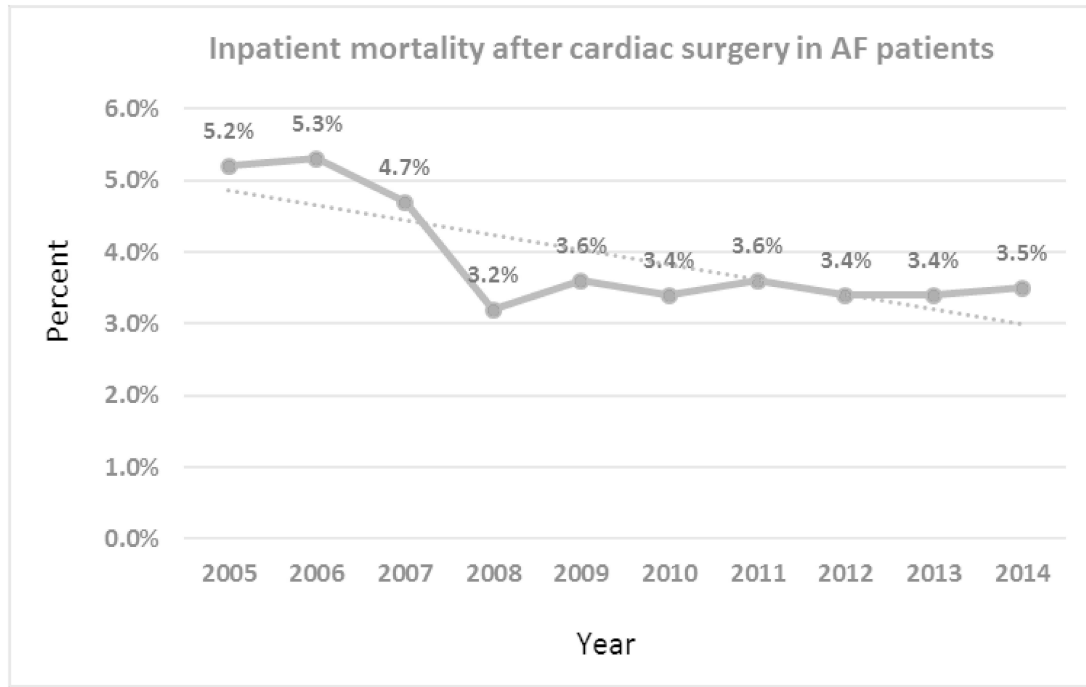

**Supplementary figure 4: Inpatient mortality after cardiac surgery**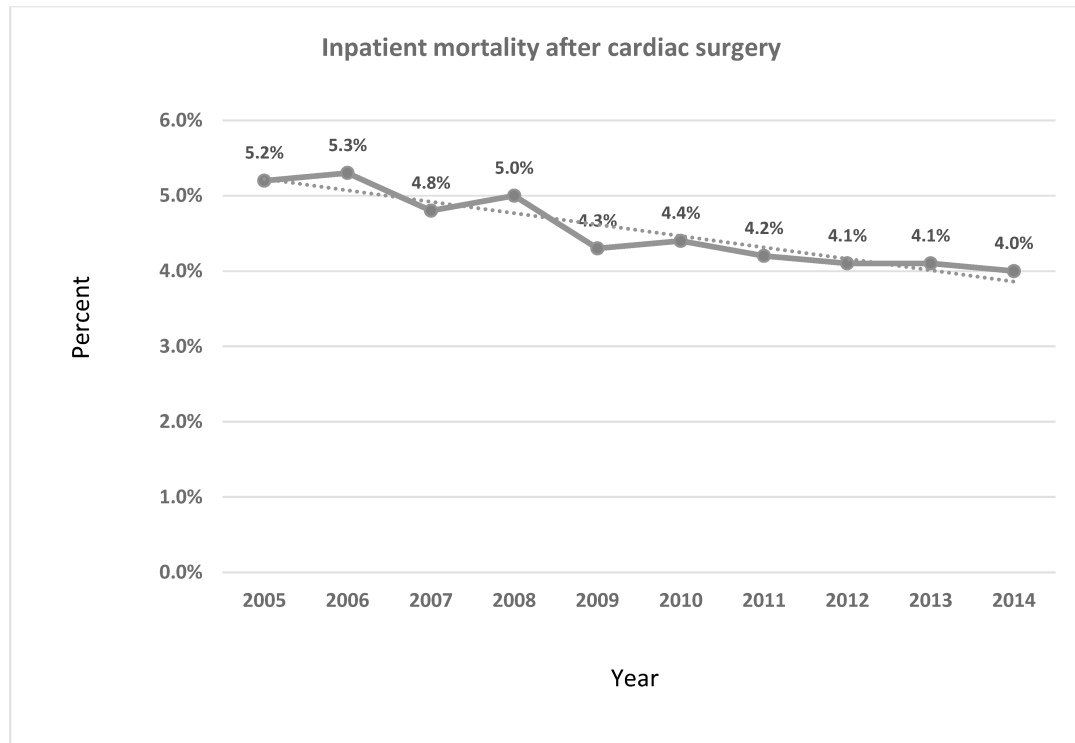

Supplement: jim-2021-001864supp001_data_supplement.pdf [file jim-2021-001864supp001_data_supplement.pdf]
